# Supplementary material
Source: ML conference proceedings conference paper supplement (https://openaccess.thecvf.com/content/ICCV2023/html/Wang_Seal-3D_Interactive_Pixel-Level_ICCV_2023_paper.html)
Supplement: Supplementary file 2 [file Wang_Seal-3D_Interactive_Pixel-Level_ICCV_2023_supplemental.zip]

Archive with 2 entries (2 files):
- 01192-supp.pdf
- Seal3D-video.mp4
